# Supplementary material
Source: publisher site journal article supplement (https://www.jstage.jst.go.jp/article/geochemj/49/4/49_2.0366/_supplement/_download/49_2.0366_1.pdf)
Supplement: Supplementary file 1 [file 49_2.0366_1.pdf]

## SUPPLEMENTARY MATERIALS

### APPENDIX S1. LA-ICP-MS MAJOR AND TRACE ELEMENT ANALYSIS

#### Instrumentation

*In situ* major and trace element determination was carried out using a Nu AttoM single-collector ICP-MS (Nu instruments, Wrexham, UK) coupled to a NWR-193 laser-ablation system (ESI, Portland, USA), that utilizes a 193 nm ArF excimer laser, at Department of Geology and Mineralogy, Kyoto University. A full list of instrumental parameters is given in Supplementary Table S1. The laser was operated with an output energy of ~9.0 mJ per pulse, repetition rate of 5 Hz and laser spot size of 35  $\mu\text{m}$  in diameter, providing an estimated power density of the sample of  $<2.6 \text{ Jcm}^{-2}$ . The pulse count was 900 shots. The ablation occurs in He gas within a micro cell, and then the ablated sample aerosol and He gas were mixed with Ar gas downstream of the cell. The He minimizes redeposition of ejecta or condensates, whereas Ar provides efficient sample transport to the ICP-MS (Eggins *et al.*, 1998; Gunther and Heinrich, 1999; Jackson *et al.*, 2004). The signal-smoothing device was applied to minimize the introduction of large aerosols into the ICP, reducing signal spikes (Tunheng and Hirata, 2004). The Hg-trap device with an activated charcoal filter was applied to the Ar make-up gas before mixing with He carrier gas (Hirata *et al.*, 2005).

#### Data acquisition and reduction

The LA-ICP-MS was optimized using continuous ablation of a NIST SRM 610 to provide maximum sensitivity, especially for rare earth elements (Supplementary Table S2), while maintaining low oxide formation ( $^{248}\text{ThO}/^{232}\text{Th} < 1\%$ ). Data were acquired on 46 isotopes (Table S2), using the low-resolution linked scan mode and the instrument's time-resolved analysis program. The linked scan mode measures the signal intensity at the peak top over full mass range combining magnet scan with fast scan ion optics. Small number of sweeps (10 sweeps) was selected, resulting in 2.2 seconds per cycle, to use the fast scanning capabilities of the instrument and to gain as much information as possible about the short transient signal during ablation. The time-resolved analysis allows us to easily identify isotopic heterogeneity due to inclusions and a compositional zoning within the ablation volume.

Prior to each individual analysis, regions of interest were pre-ablated using a few pulses of the laser with laser spot size of 50  $\mu\text{m}$  to remove potential surface contamination. Background and ablation data for each analysis were collected over ~60 seconds (Table S1). Backgrounds were measured after pre-ablation prior to each ablation with the laser shutter closed and employing iden-

Table S1. Instruments settings

|                                  |                                                                    |
|----------------------------------|--------------------------------------------------------------------|
| Nu AttoM single collector ICP-MS |                                                                    |
| RF power                         | 1300 W                                                             |
| Cooling gas flow rate            | 13 Lmin <sup>-1</sup>                                              |
| Auxiliary gas flow rate          | 0.9 Lmin <sup>-1</sup>                                             |
| Detection system                 | Mixed attenuation-ion counting                                     |
| IC dead time                     | 18 nsec.                                                           |
| Analytical mode                  | Linked scan                                                        |
| Number of sweeps                 | 10 sweeps                                                          |
| Time per cycle                   | 2.2 sec.                                                           |
| NWR193 excimer laser system      |                                                                    |
| ATLEX-SI ArF excimer laser       |                                                                    |
| Wavelength                       | 193 nm                                                             |
| Pulse energy                     | ~9.0 mJ                                                            |
| Pulse width                      | 4–6 nsec.                                                          |
| Energy density/Fulence           | $<2.6 \text{ Jcm}^{-2}$                                            |
| Repetition rate                  | 5 Hz                                                               |
| Spot diameter                    | 35 $\mu\text{m}$ for analysis<br>50 $\mu\text{m}$ for pre-ablation |
| Helium carrier gas flow rate     | 0.7 Lmin <sup>-1</sup>                                             |
| Argon make-up gas flow rate      | 0.8 Lmin <sup>-1</sup>                                             |
| Effective cell volume            | <1 mL                                                              |
| Signal smoothing device          | w/                                                                 |
| Number of laser shots            | 900 shots                                                          |

tical settings and gas flows to those used during ablation. Data were acquired in a batch of ~3 hours in duration, consisting of multiple groups of two BCR-2G and eight GA1 analyses bracketed by two NIST SRM 610 analyses. The NIST SRM 610 was used as an external standard. The composition of NIST SRM 610 used for the external calibration is GeoReM preferred values of NIST SRM 610 (Dec/09 (050509)), which are available from the GeoReM database (Jochum and Nohl, 2008) of <http://georem.mpch-mainz.gwdg.de>.  $^{44}\text{Ca}$  was used as an internal standard instead of  $^{42}\text{Ca}$  and  $^{43}\text{Ca}$ , which have similar sensitivity to that of  $^{44}\text{Ca}$ , because the higher intensity for  $^{44}\text{Ca}$  results in the higher signal to noise ratio (SNR) for  $^{44}\text{Ca}$  (Table S2). Additionally, the intensity ratios of  $^{44}\text{Ca}/^{42}\text{Ca}$  and  $^{44}\text{Ca}/^{43}\text{Ca}$  obtained for NIST SRM 610, BCR-2G and GA1 are 3.1–3.3 and 15–16, respectively, comparable to the isotopic abundance ratios of 3.2 and 15, respectively. Thus polyatomic interferences, for example by  $^{40}\text{Ca}^4\text{He}$  and  $^{28}\text{Si}^{16}\text{O}$  on  $^{44}\text{Ca}$  and  $^{27}\text{Al}^{16}\text{O}$  on  $^{43}\text{Ca}$ , may be neglected. The Ca contents for the GA1 were previously determined with EPMA (Fukuyama *et al.*, 2007). The averaged value for the Ca contents (36.6 wt.%) was used because the GA1 is homogeneous in Ca within the grain. This double normalization to an internal and external standards allows precise correction for variations in instrument and ablation yield as well as instrumental drift (Longerich *et al.*, 1996). BCR-2G was used as a secondary standard for data quality control and the results

Table S2. List of chosen isotopes, mean intensities, signal to noise ratios, sensitivities and background equivalent concentrations

| Element | Isotope         | Gas blank | NIST SRM 610            |                                      | BCR-2G           |                                      | GA1              |                                      | Sensitivity <sup>c</sup><br>(cps/ppm) | BEC <sup>d</sup><br>(ppm) |
|---------|-----------------|-----------|-------------------------|--------------------------------------|------------------|--------------------------------------|------------------|--------------------------------------|---------------------------------------|---------------------------|
|         |                 |           | Mean intensity<br>(cps) | Mean intensity <sup>a</sup><br>(cps) | SNR <sup>b</sup> | Mean intensity <sup>a</sup><br>(cps) | SNR <sup>b</sup> | Mean intensity <sup>a</sup><br>(cps) |                                       |                           |
| Li      | 7               | 4200      | 33000                   | 6.9                                  | 5200             | 0.24                                 | 4400             | 0.048                                | 64                                    | 65                        |
| Na      | 23              | 2500000   | 46000000                | 17                                   | 14000000         | 4.6                                  | 2600000          | 0.040                                | 440                                   | 5700                      |
| Mg      | 25              | 1980      | 15600                   | 6.88                                 | 708000           | 357                                  | 76200            | 37.5                                 | 293                                   | 6.76                      |
| Al      | 27              | 250000    | 2270000                 | 8.1                                  | 19500000         | 77                                   | 28100000         | 110                                  | 187                                   | 1300                      |
| P       | 31              | 16600     | 37500                   | 1.26                                 | 97200            | 4.86                                 | 18290            | 0.102                                | 60.9                                  | 272                       |
| Ca      | 42 <sup>e</sup> | 78600     | 361000                  | 3.59                                 | 276000           | 2.51                                 | 1106000          | 13.1                                 | 531                                   | 148                       |
| Ca      | 43 <sup>e</sup> | 10000     | 66000                   | 6                                    | 51400            | 4                                    | 224000           | 20                                   | 510                                   | 20                        |
| Ca      | 44 <sup>f</sup> | 37000     | 930000                  | 24                                   | 680000           | 17                                   | 3260000          | 87                                   | 520                                   | 71                        |
| Sc      | 45              | 5740      | 166000                  | 27.9                                 | 18920            | 2.30                                 | 13950            | 1.43                                 | 363                                   | 15.8                      |
| Ti      | 47              | 2230      | 17500                   | 6.85                                 | 549000           | 245                                  | 121800           | 53.6                                 | 473                                   | 4.72                      |
| V       | 51              | 5060      | 296000                  | 57.5                                 | 307000           | 59.7                                 | 311000           | 60.5                                 | 660                                   | 7.67                      |
| Cr      | 52              | 204000    | 403000                  | 0.975                                | 211000           | 0.0343                               | 234000           | 0.147                                | 586                                   | 348                       |
| Mn      | 55              | 15800     | 267000                  | 15.9                                 | 1011000          | 63.0                                 | 1411000          | 88.3                                 | 518                                   | 30.5                      |
| Fe      | 57              | 25000     | 30000                   | 0.2                                  | 1288000          | 51                                   | 40000            | 1                                    | 500                                   | 49                        |
| Co      | 59              | 11200     | 237000                  | 20.2                                 | 34000            | 2.0                                  | 11600            | 0.0357                               | 558                                   | 20.1                      |
| Ni      | 60              | 132000    | 188000                  | 0.424                                | 131000           | —                                    | 128000           | —                                    | 466                                   | 284                       |
| Cu      | 63              | 2890      | 140000                  | 47                                   | 9490             | 2.28                                 | 2920             | 0.0104                               | 460                                   | 6.27                      |
| Zn      | 66              | 640       | 45000                   | 69                                   | 15700            | 24                                   | 671              | 0.048                                | 350                                   | 1.8                       |
| Ga      | 69              | 2070      | 207000                  | 99.0                                 | 25500            | 11.3                                 | 13840            | 5.69                                 | 778                                   | 2.66                      |
| Rb      | 85              | 5680      | 250000                  | 43                                   | 36700            | 5.46                                 | 5710             | 0.00528                              | 800                                   | 7.14                      |
| Sr      | 88              | 4500      | 254000                  | 55                                   | 195000           | 42                                   | 5280             | 0.17                                 | 586                                   | 7.7                       |
| Y       | 89              | 4000      | 180000                  | 40                                   | 17900            | 3                                    | 65800            | 20                                   | 390                                   | 10                        |
| Zr      | 90              | 4700      | 92000                   | 19                                   | 44100            | 8.4                                  | 13390            | 1.8                                  | 390                                   | 12                        |
| Nb      | 93              | 5300      | 217000                  | 40                                   | 12090            | 1.3                                  | 5350             | 0.0094                               | 505                                   | 10                        |
| Sn      | 120             | 585       | 118000                  | 201                                  | 1172             | 1.00                                 | 599              | 0.0239                               | 910                                   | 0.643                     |
| Cs      | 133             | 3900      | 290000                  | 73                                   | 5170             | 0.33                                 | 3900             | 0.0                                  | 790                                   | 4.9                       |
| Ba      | 137             | 220       | 30000                   | 100                                  | 50700            | 230                                  | 217              | —                                    | 600                                   | 0.36                      |
| La      | 139             | 56        | 194000                  | 3500                                 | 12700            | 230                                  | 86               | 0.54                                 | 425                                   | 0.13                      |
| Ce      | 140             | 22        | 250000                  | 11000                                | 33000            | 1500                                 | 650              | 29                                   | 630                                   | 0.035                     |
| Pr      | 141             | 26        | 250000                  | 9600                                 | 4280             | 160                                  | 369              | 13                                   | 580                                   | 0.045                     |
| Nd      | 146             | 7         | 38000                   | 5000                                 | 2910             | 400                                  | 660              | 90                                   | 510                                   | 0.01                      |
| Sm      | 147             | 7         | 32000                   | 5000                                 | 550              | 80                                   | 528              | 70                                   | 470                                   | 0.01                      |
| Eu      | 153             | 20        | 130000                  | 6000                                 | 680              | 30                                   | 1220             | 60                                   | 540                                   | 0.04                      |
| Gd      | 157             | 43        | 30000                   | 700                                  | 520              | 11                                   | 950              | 21                                   | 400                                   | 0.10                      |
| Tb      | 159             | 14        | 199000                  | 14000                                | 500              | 40                                   | 1380             | 98                                   | 449                                   | 0.031                     |
| Dy      | 163             | 1.4       | 49000                   | 35000                                | 760              | 540                                  | 2710             | 1900                                 | 460                                   | 0.0030                    |
| Ho      | 165             | 0.7       | 197000                  | 300000                               | 570              | 800                                  | 2560             | 4000                                 | 439                                   | 0.002                     |
| Er      | 166             | 0.6       | 65000                   | 100000                               | 550              | 900                                  | 2720             | 5000                                 | 460                                   | 0.001                     |
| Tm      | 169             | 20        | 198000                  | 10000                                | 270              | 10                                   | 1330             | 70                                   | 471                                   | 0.04                      |
| Yb      | 172             | 2         | 47000                   | 20000                                | 380              | 200                                  | 2290             | 1000                                 | 490                                   | 0.004                     |
| Lu      | 175             | 16        | 189000                  | 12000                                | 227              | 13                                   | 1360             | 84                                   | 446                                   | 0.036                     |
| Hf      | 178             | 2         | 50000                   | 20000                                | 610              | 300                                  | 219              | 100                                  | 400                                   | 0.005                     |
| Ta      | 181             | 9         | 182000                  | 20000                                | 358              | 40                                   | 9                | 0                                    | 403                                   | 0.02                      |
| W       | 182             | 1         | 68000                   | 70000                                | 92               | 90                                   | 0.0000002        | —                                    | 580                                   | 0.002                     |
| Re      | 185             | 116       | 15000                   | 130                                  | 126              | 0.0862                               | 123              | 0.0603                               | 850                                   | 0.137                     |
| Au      | 197             | 12        | 8100                    | 670                                  | 15.3             | 0.28                                 | 10.9             | —                                    | 350                                   | 0.034                     |
| Pb      | 208             | 76        | 180000                  | 2400                                 | 4600             | 60                                   | 70               | —                                    | 810                                   | 0.094                     |
| Th      | 232             | 0.6       | 230000                  | 400000                               | 3400             | 6000                                 | 0.2              | —                                    | 500                                   | 0.001                     |
| U       | 238             | 0.5       | 380000                  | 800000                               | 1610             | 3000                                 | 28               | 60                                   | 830                                   | 0.001                     |

<sup>a</sup>Mean intensity for samples including both signal and noise.

<sup>b</sup>Signal to noise ratio = (mean intensity for sample – mean intensity for gas blank)/mean intensity for gas blank.

<sup>c</sup>Sensitivity determined for each isotope in NIST SRM 610.

<sup>d</sup>Background equivalent concentration = mean intensity for gas blank/sensitivity.

<sup>e</sup>Not used for this study.

<sup>f</sup>Used as an internal standard for major and trace element determination.

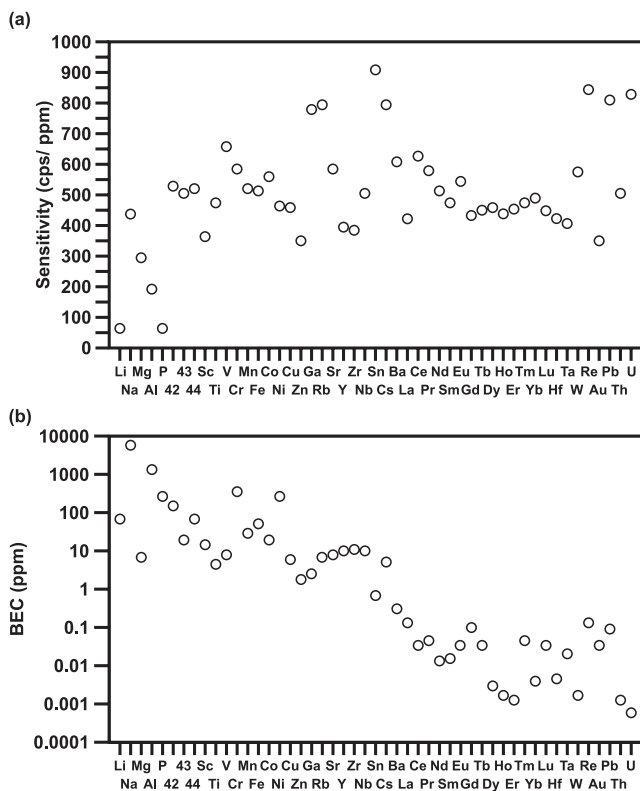

Fig. S1. (a) Sensitivity determined for each isotope in NIST SRM 610 and (b) background equivalent concentration (BEC). Note that 42, 43 and 44 represent  $^{42}\text{Ca}$ ,  $^{43}\text{Ca}$ ,  $^{44}\text{Ca}$ , respectively, and other isotopes are represented using element name.

of LA-ICP-MS analysis for BCR-2G are discussed later.

All data reduction was conducted off-line using the Iolite data reduction package (Hellstrom *et al.*, 2008; Paton *et al.*, 2011; see Iolite website: <http://iolite.earthsci.unimelb.edu.au/>), which runs within the Wavemetrics Igor Pro data analysis software, and following trace element data reduction scheme of Woodhead *et al.* (2007, 2008). Background and external standard (NIST SRM 610) intensities were interpolated between selected time periods using a smoothed cubic spline. For each selected time period for background, external standard and samples (BCR-2G and GA1), the mean and standard error of the measured ratios were calculated rejecting 2 standard deviation outliers.

#### Sensitivity and background equivalent concentration

The instrumental settings in this study provide a high sensitivity ranging from 350 to 910 cps/ppm for the analyzed isotopes, except for  $^7\text{Li}$  (64 cps/ppm),  $^{25}\text{Mg}$  (293 cps/ppm),  $^{27}\text{Al}$  (187 cps/ppm) and  $^{31}\text{P}$  (60.9 cps/ppm), and a background equivalent concentration (BEC) ranging from 0.001 to 5700 ppm, which broadly decreases with increasing atomic number (Table S2; Supplementary Fig.

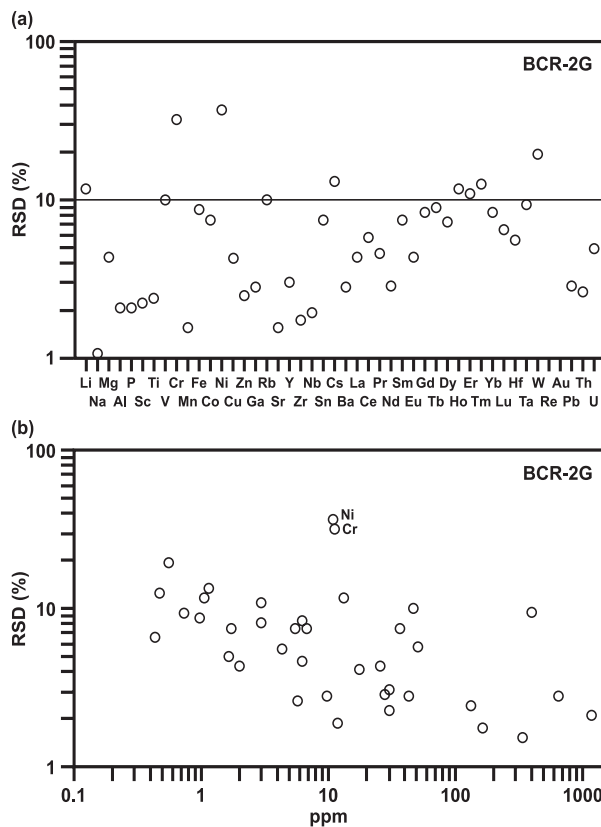

Fig. S2. (a) Relative standard deviation (RSD) for elements determined in BCR-2G and (b) correlation between RSD and element concentration determined in BCR-2G.

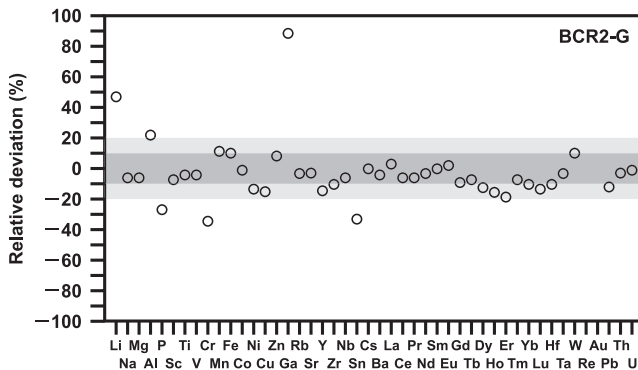

Fig. S3. Relative deviation of average concentrations in BCR-2G determined in this study from the GeoReM preferred values.

S1). The low sensitivities for the above isotopes may be due to oxide formation for Li, Mg and Al and high ionization energy for P. The high BEC for  $^{23}\text{Na}$  (5700 ppm) and  $^{27}\text{Al}$  (1300 ppm) suggests the polyatomic interferences with the  $^7\text{Li}^{16}\text{O}$  and  $^{11}\text{B}^{16}\text{O}$ , respectively, which probably stem from contamination in the instruments.

Table S3. Major and trace element concentrations (ppm) for BCR-2G

| Element | This study |                      |               |                      |                |                                 |               |                                     | GeoReM                             |
|---------|------------|----------------------|---------------|----------------------|----------------|---------------------------------|---------------|-------------------------------------|------------------------------------|
|         | Isotope    | Averaged value (ppm) | $\pm 1\sigma$ | RSD <sup>a</sup> (%) | N <sup>b</sup> | Averaged LOD <sup>c</sup> (ppm) | $\pm 1\sigma$ | Relative deviation <sup>d</sup> (%) | Preferred value <sup>e</sup> (ppm) |
| Li      | 7          | 13                   | 2             | 12                   | 10             | 9                               | 2             | 47                                  | 9                                  |
| Na      | 23         | 22400                | 200           | 1                    | 10             | 500                             | 200           | -7                                  | 24000                              |
| Mg      | 24         | 20200                | 900           | 4                    | 10             | 10                              | 10            | -6                                  | 21500                              |
| Al      | 27         | 87000                | 2000          | 2                    | 10             | 30                              | 10            | 23                                  | 70900                              |
| P       | 31         | 1180                 | 30            | 3                    | 10             | 8                               | 3             | -26                                 | 1600                               |
| Sc      | 45         | 30.6                 | 0.7           | 2                    | 10             | 1.7                             | 0.2           | -7                                  | 33                                 |
| Ti      | 47         | 13000                | 300           | 2                    | 10             | 9                               | 3             | -4                                  | 13600                              |
| V       | 51         | 400                  | 40            | 10                   | 10             | 0.6                             | 0.1           | -6                                  | 425                                |
| Cr      | 52         | 11                   | 4             | 32                   | 10             | 3.2                             | 0.6           | -35                                 | 17                                 |
| Mn      | 55         | 1640                 | 30            | 2                    | 10             | 2.0                             | 0.7           | 9                                   | 1500                               |
| Fe      | 56         | 106000               | 9000          | 8                    | 10             | 30                              | 20            | 10                                  | 96400                              |
| Co      | 59         | 37                   | 3             | 8                    | 10             | 1.7                             | 0.7           | -2                                  | 38                                 |
| Ni      | 60         | 11                   | 4             | 36                   | 5              | 8                               | 3             | -14                                 | 13                                 |
| Cu      | 63         | 17.8                 | 0.7           | 4                    | 10             | 1.3                             | 0.4           | -15                                 | 21                                 |
| Zn      | 66         | 136                  | 3             | 2                    | 10             | 1.6                             | 0.3           | 9                                   | 125                                |
| Ga      | 69         | 43                   | 1             | 3                    | 10             | 0.5                             | 0.1           | 89                                  | 23                                 |
| Rb      | 85         | 45                   | 5             | 10                   | 10             | 0.7                             | 0.2           | -3                                  | 47                                 |
| Sr      | 88         | 333                  | 5             | 2                    | 10             | 1.2                             | 0.2           | -3                                  | 342                                |
| Y       | 89         | 29.9                 | 0.9           | 3                    | 10             | 2.0                             | 0.5           | -15                                 | 35                                 |
| Zr      | 90         | 164                  | 3             | 2                    | 10             | 3.0                             | 0.5           | -11                                 | 184                                |
| Nb      | 93         | 11.7                 | 0.2           | 2                    | 10             | 0.7                             | 0.2           | -6                                  | 13                                 |
| Sn      | 118        | 1.7                  | 0.1           | 7                    | 10             | 0.30                            | 0.06          | -33                                 | 3                                  |
| Cs      | 133        | 1.2                  | 0.2           | 13                   | 10             | 0.4                             | 0.1           | 0                                   | 1                                  |
| Ba      | 137        | 650                  | 20            | 3                    | 10             | 2                               | 2             | -5                                  | 683                                |
| La      | 139        | 25                   | 1             | 4                    | 10             | 0.23                            | 0.08          | 3                                   | 25                                 |
| Ce      | 140        | 50                   | 3             | 6                    | 10             | 0.2                             | 0.1           | -6                                  | 53                                 |
| Pr      | 141        | 6.3                  | 0.3           | 5                    | 10             | 0.09                            | 0.04          | -6                                  | 7                                  |
| Nd      | 146        | 27.9                 | 0.8           | 3                    | 10             | 0.3                             | 0.2           | -4                                  | 29                                 |
| Sm      | 147        | 6.6                  | 0.5           | 7                    | 10             | 0.3                             | 0.1           | 0                                   | 7                                  |
| Eu      | 153        | 2.00                 | 0.09          | 4                    | 10             | 0.09                            | 0.02          | 1                                   | 2                                  |
| Gd      | 157        | 6.1                  | 0.5           | 8                    | 10             | 0.8                             | 0.3           | -9                                  | 7                                  |
| Tb      | 159        | 0.95                 | 0.08          | 9                    | 10             | 0.07                            | 0.04          | -7                                  | 1                                  |
| Dy      | 163        | 5.6                  | 0.4           | 7                    | 10             | 0.06                            | 0.08          | -13                                 | 6                                  |
| Ho      | 165        | 1.1                  | 0.1           | 12                   | 10             | 0.04                            | 0.05          | -16                                 | 1                                  |
| Er      | 166        | 3.0                  | 0.3           | 11                   | 10             | 0.1                             | 0.1           | -19                                 | 4                                  |
| Tm      | 169        | 0.47                 | 0.06          | 13                   | 10             | 0.09                            | 0.03          | -7                                  | 1                                  |
| Yb      | 172        | 3.0                  | 0.2           | 8                    | 10             | 0.1                             | 0.1           | -11                                 | 3                                  |
| Lu      | 175        | 0.43                 | 0.03          | 7                    | 10             | 0.08                            | 0.03          | -14                                 | 1                                  |
| Hf      | 178        | 4.3                  | 0.2           | 5                    | 10             | 0.1                             | 0.1           | -11                                 | 5                                  |
| Ta      | 181        | 0.75                 | 0.07          | 9                    | 10             | 0.09                            | 0.07          | -4                                  | 1                                  |
| W       | 182        | 0.6                  | 0.1           | 19                   | 9              | 0.04                            | 0.08          | 10                                  | 1                                  |
| Re      | 185        | <LOD                 | —             | —                    | —              | 0.14                            | 0.03          | —                                   | 0                                  |
| Au      | 197        | 0.037                | 0             | 0                    | 1              | 0.04                            | 0.02          | —                                   | —                                  |
| Pb      | 208        | 9.7                  | 0.3           | 3                    | 10             | 0.11                            | 0.03          | -12                                 | 11                                 |
| Th      | 232        | 5.7                  | 0.1           | 3                    | 10             | 0.01                            | 0.01          | -3                                  | 6                                  |
| U       | 238        | 1.67                 | 0.08          | 5                    | 10             | 0.00                            | 0.01          | -1                                  | 2                                  |

<sup>a</sup>1 sigma relative standard deviation.

<sup>b</sup>Number of analysis used for estimate of averaged values.

<sup>c</sup>Limit of detection averaged for 10 repeated analyses.

<sup>d</sup>Relative deviation of averaged concentrations determined in BCR-2G from the GeoReM preferred values.

<sup>e</sup>GeoReM preferred values of BCR-2G (1/2009; Jochum (Max-Planck-Institute fuer Chemie)) are from the GeoReM database (Jochum and Nohl, 2008) of <http://georem.mpch-mainz.gwdg.de>

Table S4. Major and trace element concentrations (ppm) for GAI

| Element         | This study (NIST SRM 610 as external standard) |                      |               |                      |                |                                 |               | Fukuyama <i>et al.</i> (2007) <sup>d</sup> |               |                      |                |
|-----------------|------------------------------------------------|----------------------|---------------|----------------------|----------------|---------------------------------|---------------|--------------------------------------------|---------------|----------------------|----------------|
|                 | Isotope                                        | Averaged value (ppm) | $\pm 1\sigma$ | RSD <sup>a</sup> (%) | N <sup>b</sup> | Averaged LOD <sup>c</sup> (ppm) | $\pm 1\sigma$ | Averaged value (ppm)                       | $\pm 1\sigma$ | RSD <sup>a</sup> (%) | N <sup>b</sup> |
| Li              | 7                                              | <LOD                 | —             | —                    | —              | 8                               | 2             | 5                                          | 3             | 53                   | 3              |
| Na              | 23                                             | <LOD                 | —             | —                    | —              | 300                             | 300           | —                                          | —             | —                    | —              |
| Mg              | 24                                             | 2200                 | 100           | 5                    | 34             | 8                               | 2             | 2000                                       | 200           | 10                   | 3              |
| Al              | 27                                             | 130000               | 3000          | 2                    | 34             | 30                              | 30            | 116400                                     | 300           | 0                    | 3              |
| P               | 31                                             | 25                   | 4             | 15                   | 34             | 7                               | 2             | —                                          | —             | —                    | —              |
| Ca <sup>e</sup> | 44                                             | —                    | —             | —                    | —              | —                               | —             | 262000                                     | 1000          | 0                    | 3              |
| Sc              | 45                                             | 19.9                 | 0.6           | 3                    | 34             | 1.8                             | 0.6           | 35                                         | 3             | 9                    | 3              |
| Ti              | 47                                             | 2990                 | 70            | 2                    | 34             | 7                               | 2             | <100                                       | —             | —                    | 3              |
| V               | 51                                             | 430                  | 60            | 14                   | 34             | 0.7                             | 0.2           | 370                                        | 10            | 3                    | 3              |
| Cr              | 52                                             | 60                   | 10            | 17                   | 34             | 3.4                             | 0.8           | <100                                       | —             | —                    | 3              |
| Mn              | 55                                             | 2380                 | 60            | 3                    | 34             | 2                               | 2             | 2000                                       | 200           | 10                   | 3              |
| Fe              | 56                                             | 1400                 | 100           | 7                    | 34             | 18                              | 4             | 800                                        | 200           | 25                   | 3              |
| Co              | 59                                             | <LOD                 | —             | —                    | —              | 1.7                             | 0.6           | 20                                         | 5             | 24                   | 3              |
| Ni              | 60                                             | <LOD                 | —             | —                    | —              | 7                               | 2             | —                                          | —             | —                    | —              |
| Cu              | 63                                             | <LOD                 | —             | —                    | —              | 1.0                             | 0.3           | 9                                          | 5             | 58                   | 3              |
| Zn              | 66                                             | <LOD                 | —             | —                    | —              | 1.6                             | 0.4           | 8                                          | 8             | 98                   | 3              |
| Ga              | 69                                             | 22.9                 | 0.8           | 3                    | 34             | 0.5                             | 0.1           | 18                                         | 1             | 6                    | 3              |
| Rb              | 85                                             | <LOD                 | —             | —                    | —              | 0.7                             | 0.1           | 0.9                                        | 0.3           | 29                   | 2              |
| Sr              | 88                                             | 1.3                  | 0.3           | 25                   | 18             | 1.2                             | 0.4           | 1.7                                        | 0.9           | 52                   | 3              |
| Y               | 89                                             | 135                  | 4             | 3                    | 34             | 2.0                             | 0.4           | 148                                        | 3             | 2                    | 3              |
| Zr              | 90                                             | 38                   | 1             | 4                    | 34             | 2.7                             | 0.8           | 41                                         | 4             | 9                    | 3              |
| Nb              | 93                                             | <LOD                 | —             | —                    | —              | 0.7                             | 0.2           | 0.5                                        | 0.4           | 76                   | 3              |
| Sn              | 118                                            | <LOD                 | —             | —                    | —              | 0.3                             | 0.1           | 4                                          | 2             | 40                   | 3              |
| Cs              | 133                                            | <LOD                 | —             | —                    | —              | 0.4                             | 0.1           | 0.7                                        | 0.4           | 64                   | 3              |
| Ba              | 137                                            | <LOD                 | —             | —                    | —              | 1.6                             | 0.4           | 2.93                                       | 0.00          | 0                    | 1              |
| La              | 139                                            | 0.21                 | 0.03          | 17                   | 13             | 0.19                            | 0.07          | 0.26                                       | 0.07          | 29                   | 3              |
| Ce              | 140                                            | 1.0                  | 0.1           | 14                   | 34             | 0.14                            | 0.09          | 1.0                                        | 0.1           | 13                   | 3              |
| Pr              | 141                                            | 0.56                 | 0.05          | 8                    | 34             | 0.07                            | 0.02          | 0.5                                        | 0.1           | 22                   | 3              |
| Nd              | 146                                            | 6.7                  | 0.4           | 7                    | 34             | 0.2                             | 0.1           | 6.1                                        | 0.6           | 9                    | 3              |
| Sm              | 147                                            | 6.7                  | 0.3           | 5                    | 34             | 0.3                             | 0.2           | 7                                          | 2             | 23                   | 3              |
| Eu              | 153                                            | 3.8                  | 0.2           | 4                    | 34             | 0.09                            | 0.03          | 3.2                                        | 0.7           | 22                   | 3              |
| Gd              | 157                                            | 11.8                 | 0.6           | 5                    | 34             | 0.8                             | 0.2           | 12.0                                       | 0.7           | 6                    | 3              |
| Tb              | 159                                            | 2.7                  | 0.2           | 6                    | 34             | 0.06                            | 0.03          | 2.9                                        | 0.3           | 10                   | 3              |
| Dy              | 163                                            | 20.8                 | 0.8           | 4                    | 34             | 0.09                            | 0.09          | 21.3                                       | 0.7           | 3                    | 3              |
| Ho              | 165                                            | 5.1                  | 0.3           | 6                    | 34             | 0.03                            | 0.05          | 5.5                                        | 0.3           | 5                    | 3              |
| Er              | 166                                            | 15.5                 | 0.7           | 5                    | 34             | 0.1                             | 0.1           | 17                                         | 1             | 9                    | 3              |
| Tm              | 169                                            | 2.5                  | 0.1           | 5                    | 34             | 0.08                            | 0.04          | 2.6                                        | 0.1           | 5                    | 3              |
| Yb              | 172                                            | 18.9                 | 0.9           | 5                    | 34             | 0.2                             | 0.1           | 21.5                                       | 0.8           | 4                    | 3              |
| Lu              | 175                                            | 2.8                  | 0.1           | 3                    | 34             | 0.08                            | 0.03          | 2.7                                        | 0.2           | 9                    | 3              |
| Hf              | 178                                            | 1.7                  | 0.2           | 10                   | 34             | 0.1                             | 0.1           | 1.6                                        | 0.4           | 27                   | 3              |
| Ta              | 181                                            | <LOD                 | —             | —                    | —              | 0.09                            | 0.05          | 0.5                                        | 0.1           | 30                   | 3              |
| W               | 182                                            | <LOD                 | —             | —                    | —              | 0.1                             | 0.1           | 0.5                                        | 0.4           | 72                   | 2              |
| Re              | 185                                            | <LOD                 | —             | —                    | —              | 0.16                            | 0.04          | —                                          | —             | —                    | —              |
| Au              | 197                                            | <LOD                 | —             | —                    | —              | 0.04                            | 0.02          | —                                          | —             | —                    | —              |
| Pb              | 208                                            | <LOD                 | —             | —                    | —              | 0.09                            | 0.03          | 0.43                                       | 0.05          | 13                   | 3              |
| Th              | 232                                            | 0.002                | 0.002         | 66                   | 6              | 0.002                           | 0.004         | 0.3                                        | 0.1           | 37                   | 2              |
| U               | 238                                            | 0.030                | 0.004         | 15                   | 34             | 0.002                           | 0.004         | 0.09                                       | 0.00          | 0                    | 1              |

<sup>a</sup>1 sigma relative standard deviation.

<sup>b</sup>Number of analysis used for estimate of averaged values.

<sup>c</sup>Limit of detection averaged for 34 repeated analyses.

<sup>d</sup>Concentrations in the GAI were determined with LA-ICP-MS, except for those of Mg, Al, Ca, Ti, Cr, Mn and Fe determined with EPMA.

<sup>e</sup><sup>44</sup>Ca was used as internal standard.

However, the  ${}^7\text{Li}^{16}\text{O}$  from NIST SRM 610 and BCR-2G does not significantly increase the intensity of  ${}^{23}\text{Na}$  because of high Na concentrations in the samples. The aluminum oxide formation (e.g.,  ${}^{27}\text{Al}^{16}\text{O}$ ) does not cause the polyatomic interferences on  ${}^{43}\text{Ca}$ , as discussed above.

#### BCR-2G

Analytical results of BCR-2G used are listed with precision as 1 s relative standard deviation (RSD) in Supplementary Table S3. Data on the limits of detection (LOD) are also given in Table S3. For comparison, GeoReM preferred values of BCR-2G (1/2009; Jochum (Max-Planck-Institute fuer Chemie)) are also listed in Table S3. The GeoReM preferred values are available from the GeoReM database (Jochum and Nohl, 2008).

Two elements (Re and Au) out of 46 elements analyzed for the BCR-2G have concentrations below the LOD (Table S3). The RSD for other 44 major and trace elements is generally better than 10% for most elements, except for Li (12%), Cr (32%), Ni (36%), Cs (13%), Ho (12%), Er (11%), Tm (13%) and W (19%) (Table S3; Supplementary Fig. S2a). The high RSD for the above elements is due to very low concentrations in the case of Cs (1.2 ppm), Ho (1.1 ppm), Er (3.0 ppm), Tm (0.5 ppm) and W (0.6 ppm). Although the Li (13 ppm), Cr (11 ppm) and Ni (8 ppm) have higher concentrations, their SNR are low (Li = 0.24, Cr = 0.0343, Ni < 0; Table S2). This is one of the reasons for the high RSD.

Elements in BCR-2G with concentrations less than 1500 ppm show negative correlation between concentration and RSD on a logarithmic scale with a logarithmic correlation coefficient of  $-0.74$  ( $R^2 = 0.1628$ ; Fig. S2b), which is similar to that estimated from the results of LA-ICP-MS analysis for BCR-2G with the laser spot of 60  $\mu\text{m}$  by Gao *et al.* (2002; a logarithmic correlation coefficient of  $-0.76$ ). This trend indicates that the difference in the scatter of apparent element concentrations is not by chemical heterogeneity but counting statistics, suggesting that BCR-2G is overall homogeneous on a scale resolution of 35  $\mu\text{m}$ , as shown by previous studies (Gao *et al.*, 2002; Norman *et al.*, 1998; Rocholl, 1998). However, Cr and Ni with high RSD do not follow the trend whereas concentrations of these elements determined by Gao *et al.* (2002) show lower RSD and follow the trend in Gao *et al.* (2002). These lines of evidence may suggest that BCR-2G is unlikely homogeneous in concentrations of Cr and Ni on this scale resolution. Alternatively, their lower SNR could result in the outliers.

Most of element concentrations in BCR-2G determined in this study agree with the GeoReM preferred values of BCR-2G within  $\pm 20\%$  relative (Table S3; Supplementary Fig. S3). Exceptions are Li (+47%), Al (+22%), P (−27%), Cr (−35%), Ga (+89%) and Sn (−33%). However, Cr is consistent with the reference value within

error (2sd). It should be noted that Sn (1.7 ppm) is relatively low concentrations in BCR-2G.

The agreement between the reference and obtained values for Na, Mg, Ti and Fe in BCR-2G as well as trace elements demonstrates the quantification capability of the LA-ICP-MS system up to concentrations of at least several weight percent due to its extended detector dynamic range of  $10^9$ . The wide dynamic range extends the possibility of major element measurements with LA-ICP-MS and the use of multiple internal standards.

#### REFERENCES

- Eggins, S. M., Kinsley, L. P. J. and Shelley, J. M. G. (1998) Deposition and element fractionation processes during atmospheric pressure laser sampling for analysis by ICP-MS. *Appl. Surf. Sci.* **129**, 278–286.
- Fukuyama, M., Ogasawara, M., Sato, H. and Ishiyama, D. (2007) Trace element analysis of gem garnet by LA-ICP-MS: preliminary evaluation as micro-beam standard. *Bull. Geol. Surv. Jpn.* **58**, 93–103.
- Gao, S., Liu, X., Yuan, H., Hattendorf, B., Gunther, D., Chen, L. and Hu, S. (2002) Determination of forty two major and trace elements in USGS and NIST SRM glasses by laser ablation-inductively coupled plasma-mass spectrometry. *Geostand. Newsl. J. Geostand. Geoanal.* **26**, 181–196.
- Gunther, D. and Heinrich, C. A. (1999) Enhanced sensitivity in laser ablation-ICP mass spectrometry using helium-argon mixtures as aerosol carrier. *J. Anal. At. Spectrom.* **14**, 1363–1368.
- Hellstrom, J., Paton, C., Woodhead, J. D. and Hergt, J. M. (2008) Iolite: software for spatially resolved LA-(quad and MC)-ICPMS analysis. *Laser Ablation ICP-MS in the Earth Sciences: Current Practices and Outstanding Issues* (Sylvester, P., ed.), *Mineralogical Association of Canada Short Course Series* **40**, 343–348.
- Hirata, T., Iizuka, T. and Orihashi, Y. (2005) Reduction of mercury background on ICP-mass spectrometry for *in situ* U-Pb age determinations of zircon samples. *J. Anal. At. Spectrom.* **20**, 696–701.
- Jackson, S. E., Pearson, N. J., Griffin, W. L. and Belousova, E. A. (2004) The application of laser ablation-inductively coupled plasma-mass spectrometry to *in situ* U-Pb zircon geochronology. *Chem. Geol.* **211**, 47–69.
- Jochum, K. P. and Nohl, U. (2008) Reference materials in geochemistry and environmental research and the GeoReM database. *Chem. Geol.* **253**, 50–53.
- Longerich, H. P., Jackson, S. E. and Gunther, D. (1996) Laser ablation inductively coupled plasma mass spectrometric transient signal data acquisition and analyte concentration calculation. *J. Anal. At. Spectrom.* **11**, 899–904.
- Norman, M. D., Griffin, W. L., Pearson, N. J., Garcia, M. O. and O'Reilly, S. Y. (1998) Quantitative analysis of trace element abundances in glasses and minerals: a comparison of laser ablation inductively coupled plasma mass spectrometry, solution inductively coupled plasma mass spectrometry, proton microprobe and electron microprobe data. *J. Anal. At. Spectrom.* **13**, 477–482.

- Paton, C., Hellstrom, J., Paul, B., Woodhead, J. and Hergt, J. (2011) Iolite: Freeware for the visualisation and processing of mass spectrometric data. *J. Anal. At. Spectrom.* **26**, 2508–2518.
- Rocholl, A. (1998) Major and trace element composition and homogeneity of microbeam reference material: basalt glass USGS BCR-2G. *Geostand. Newsl. J. Geostand. Geoanal.* **22**, 33–45.
- Tunheng, A. and Hirata, T. (2004) Development of signal smoothing device for precise elemental analysis using laser ablation-ICP-mass spectrometry. *J. Anal. At. Spectrom.* **19**, 932–934.
- Woodhead, J. D., Hellstrom, J., Hergt, J., Greig, A. and Maas, R. (2007) Isotopic and elemental imaging of geological materials by laser ablation inductively coupled plasma mass spectrometry. *Geostand. Geoanal. Res.* **31**, 331–343.
- Woodhead, J. D., Hellstrom, J., Paton, C., Hergt, J. M., Greig, A. and Maas, R. (2008) A guide to depth profiling and imaging applications of LA-ICP-MS. *Laser Ablation ICP-MS in the Earth Sciences: Current Practices and Outstanding Issues* (Sylvester, P., ed.), *Mineralogical Association of Canada Short Course Series* **40**, 135–145.
